# Supplementary material for: COMMD7 Regulates NF-κB Signaling Pathway in Hepatocellular Carcinoma Stem-like Cells
Source: PubMed Central journal article supplement — Mol Ther Oncolytics. 2018 Dec 14;12:112–23. doi: 10.1016/j.omto.2018.12.006 (PMC6350112; doi:10.1016/j.omto.2018.12.006), 2018-12-14
Supplement: mmc1.pdf [file mmc1.pdf]

OMTO, Volume 12

## **Supplemental Information**

### **COMMD7 Regulates NF- $\kappa$ B Signaling Pathway in Hepatocellular Carcinoma Stem-like Cells**

**Lu Zheng, Nan You, Xiaobing Huang, Huiying Gu, Ke Wu, Na Mi, and Jing Li**

Supplementary figure 1

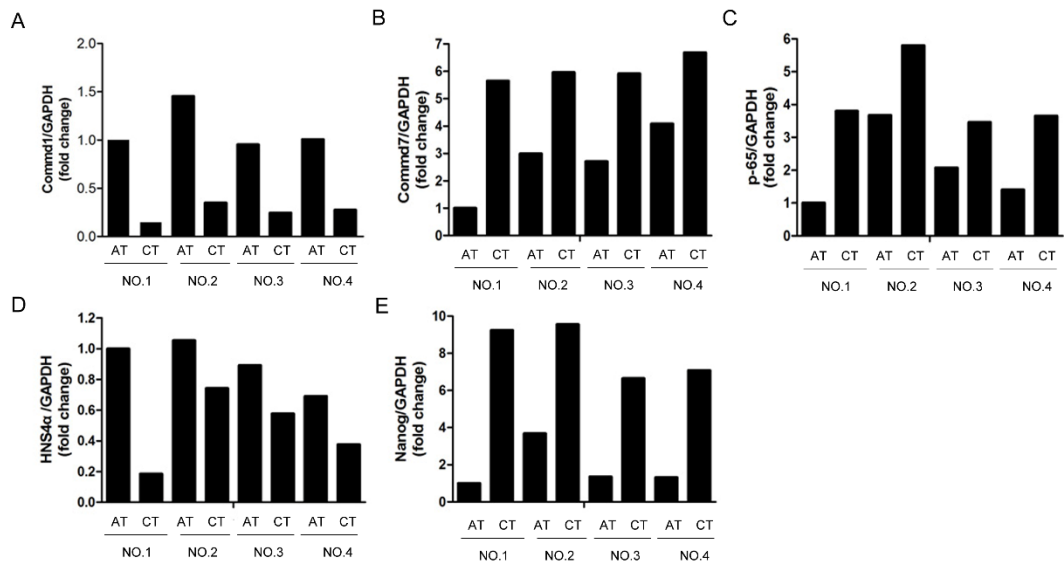

Supplementary figure 2

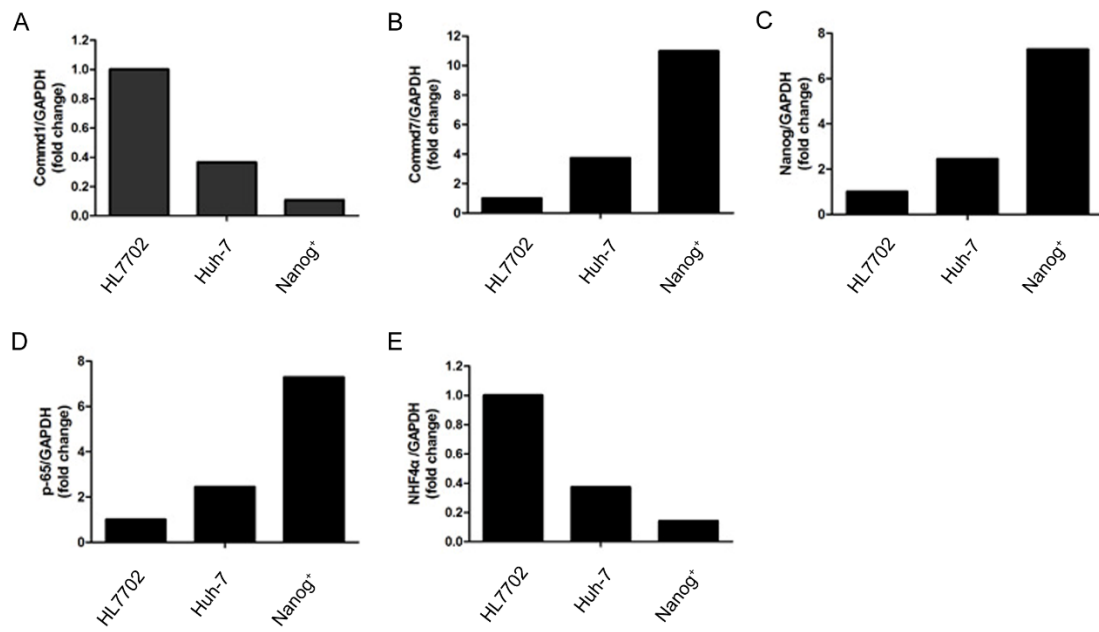

Supplementary figure 3

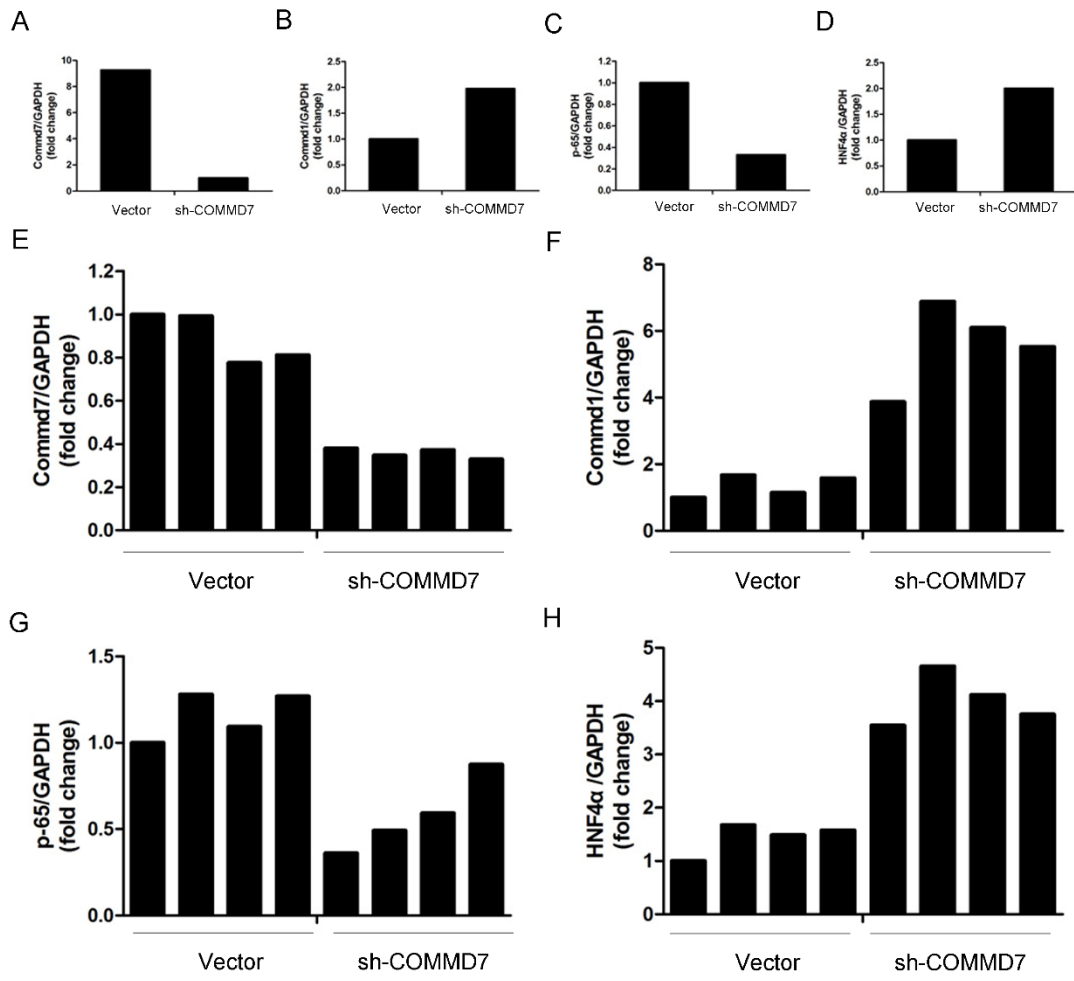

Supplementary figure 4

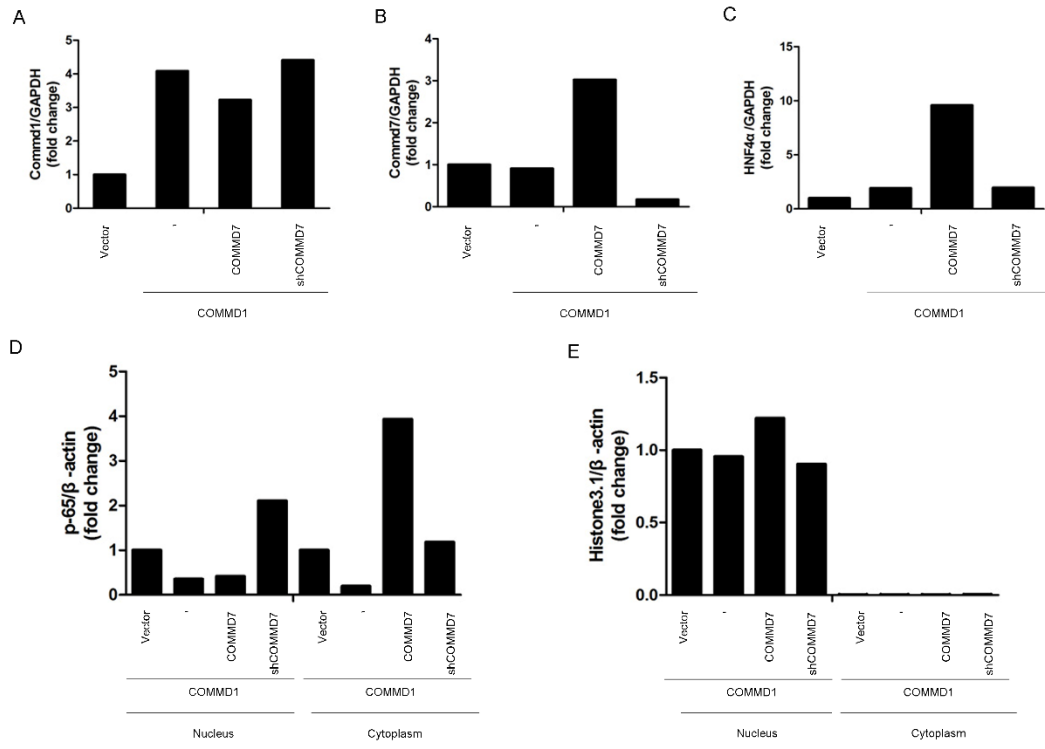

Supplementary figure 5

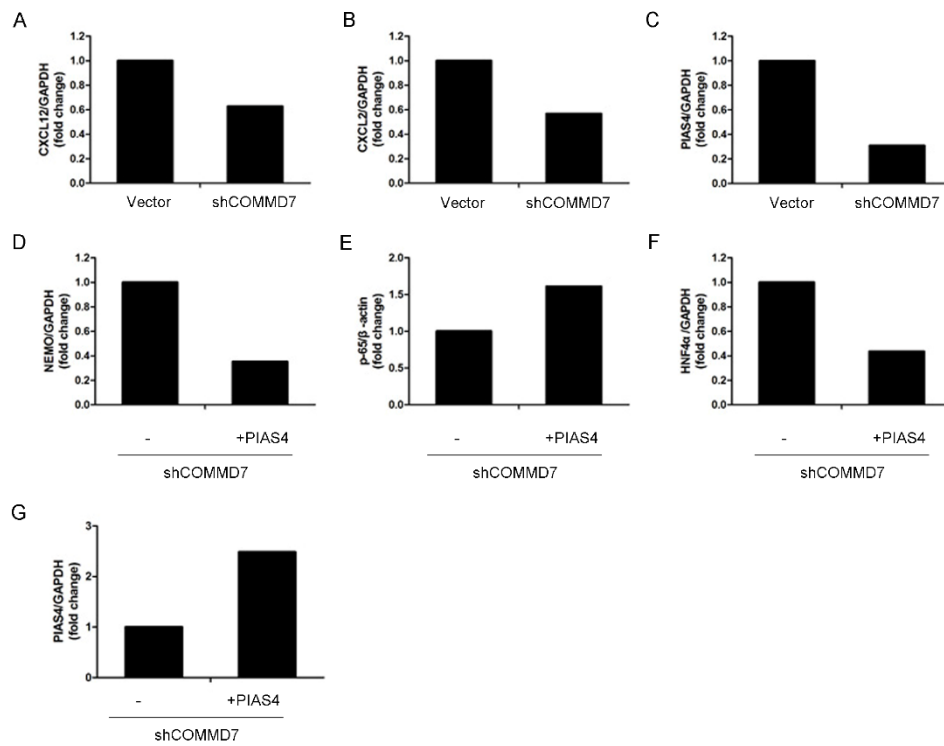

Supplementary figure legends:

S1

The grayscale analysis of F1c.

S2

The grayscale analysis of F2b.

S3

The grayscale analysis of F3c and F3k.

S4

The grayscale analysis of F4b and F4c.

S5

The grayscale analysis of F7b and F7d.

**Table S1** Primers for quantitative real-time polymerase chain reaction (qRT-PCR)

| Gene          | Forward (5' - 3')       | Reverse (5' - 3')       |
|---------------|-------------------------|-------------------------|
| Nanog         | CCCCAGCCTTTACTCTTCCTA   | CCAGGTTGAATTGTTCCAGGTC  |
| COMMD7        | TCCAGGCGGATTTTCATAACTCT | CACTTTCTCCAATTCGCTGCT   |
| COMMD1        | CTGTTGCCATTATAGAGCTGGAA | GCGTCTTCAGAATTTGGTTGACT |
| HNF4 $\alpha$ | CGAAGGTCAAGCTATGAGGACA  | ATCTGCGATGCTGGCAATCT    |
| PIAS4         | ATGAACGAGAAGAAGCCCAC    | TCCACCAGGTACTCGATCTC    |
| GAPDH         | TGTTTCGTCATGGGTGTGAAC   | ATGGCATGGACTGTGGTCAT    |

**Table S2** Top 10 KEGG pathways in Nanog<sup>+</sup> hepatocellular carcinoma stem cells after COMMD7 knockdown with *p* value < 0.05

| Pathway ID                           | P-value  | Count | Genes                                                                     |
|--------------------------------------|----------|-------|---------------------------------------------------------------------------|
| Has04668, TNF signaling pathway      | 1.31E-05 | 11    | AKT3, CCL20, CXCL1, CXCL2, CXCL5, FOS, ICAM1, JUN, NFKBIA, SOCS3, TNFAIP3 |
| Has04915, Estrogen signaling pathway | 1.87E-04 | 9     | ADCY8, AKT3, FOS, GABBR2, GNAO1, HSPA1A, HSPA1B, JUN, PLCB4               |
| Has05323, Rheumatoid arthritis       | 4.46E-04 | 8     | CCL20, CXCL1, CXCL12, CXCL5, FOS, ICAM1, JUN, TGFB2                       |

---

|                                                      |          |    |                                                                                      |
|------------------------------------------------------|----------|----|--------------------------------------------------------------------------------------|
| Has04621, NOD-like<br>receptor signaling<br>pathway  | 6.68E-04 | 11 | CAMP, CARD16, CASP4,<br>CASP5, CXCL1, CXCL2, JUN,<br>NFKBIA, NOX1, PLCB4,<br>TNFAIP3 |
| Has05134,<br>Legionellosis                           | 8.25E-04 | 6  | CXCL1, CXCL2, HBS1L,<br>HSPA1A, HSPA1B, NFKBIA                                       |
| Has04380, Osteoclast<br>differentiation              | 1.43E-03 | 9  | AKT3, FOS, FYN, JUN, NCF2,<br>NFKBIA, NOX1, SOCS3, TGFB2                             |
| Has04725, Cholinergic<br>synapse                     | 1.85E-03 | 8  | ADCY8, AKT3, CHAT,<br>CHRNA3, FOS, FYN, GNAO1,<br>PLCB4                              |
| Has04670, Leukocyte<br>transendothelial<br>migration | 2.45E-03 | 8  | CLDN11, CXCL12, CXCR4,<br>ICAM1, JAM3, NCF2, NOX1,<br>THY1                           |
| Has05145,<br>Toxoplasmosis                           | 2.72E-03 | 8  | AKT3, GNAO1, HSPA1A,<br>HSPA1B, LAMA1, LY96,<br>NFKBIA, TGFB2                        |
| Has04064, NF- $\kappa$ B<br>signaling pathway        | 3.14E-03 | 7  | CXCL12, CXCL2, ICAM1, LY96,<br>NFKBIA, PIAS4, TNFAIP3                                |

---

KEGG, Kyoto Encyclopedia of Genes and Genomes
